# Supplementary material for: 3D anatomical and perfusion MRI for longitudinal evaluation of biomaterials for bone regeneration of femoral bone defect in rats
Source: PubMed Central journal article supplement (PMC5522444; doi:10.1038/s41598-017-06258-0), 2017-07-21
Supplement: 41598_2017_6258_MOESM1_ESM.pdf [file 41598_2017_6258_MOESM1_ESM.pdf]

**3D anatomical and perfusion MRI for longitudinal evaluation of biomaterials for bone regeneration of femoral bone defect in rats**

Emeline J Ribot<sup>1\*#</sup>, Clement Tournier<sup>2#</sup>, Rachida Aid-Launais<sup>3</sup>, Neha Koonjoo<sup>1</sup>, Hugo Oliveira<sup>2</sup>, Aurelien J Trotier<sup>1</sup>, Sylvie Rey<sup>2</sup>, Didier Wecker<sup>4</sup>, Didier Letourneur<sup>3</sup>, Joelle Amedee Vilamitjana<sup>2</sup>, Sylvain Miraux<sup>1</sup>

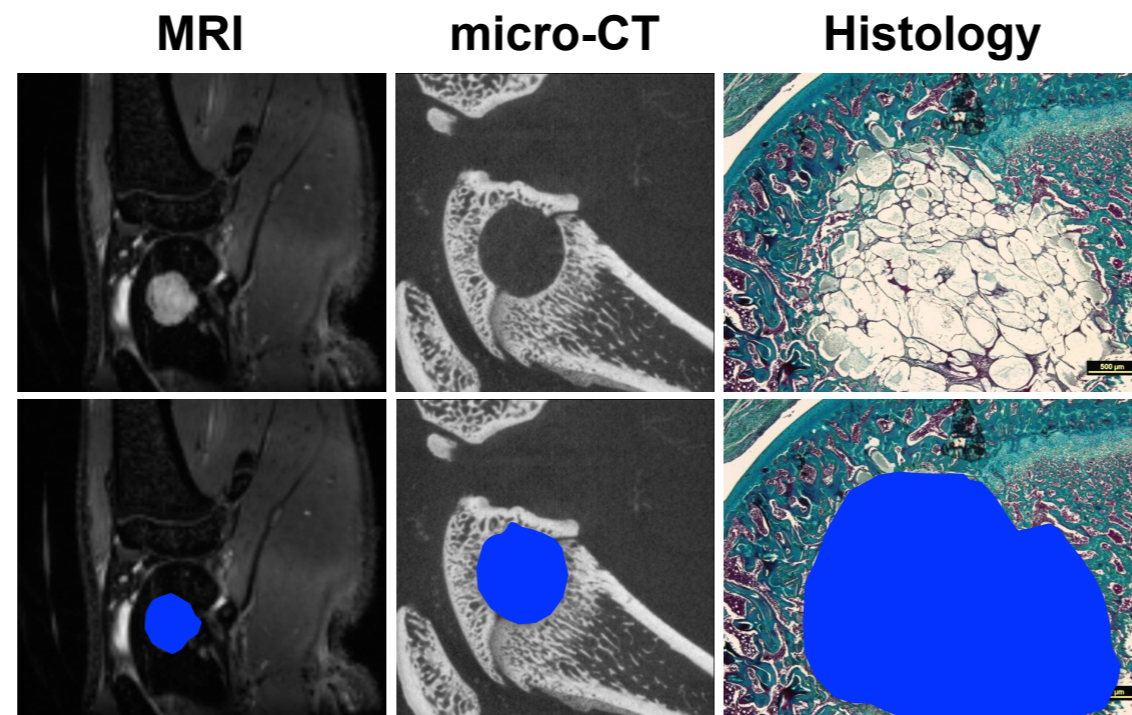

**Supplementary Figure 1:** Typical MRI, micro-CT and histology images at week 1 after implantation of a bone defect filled with a Matrix-HA-Fuco. The lower row shows the biomaterial-filled defect area in blue on each modality.

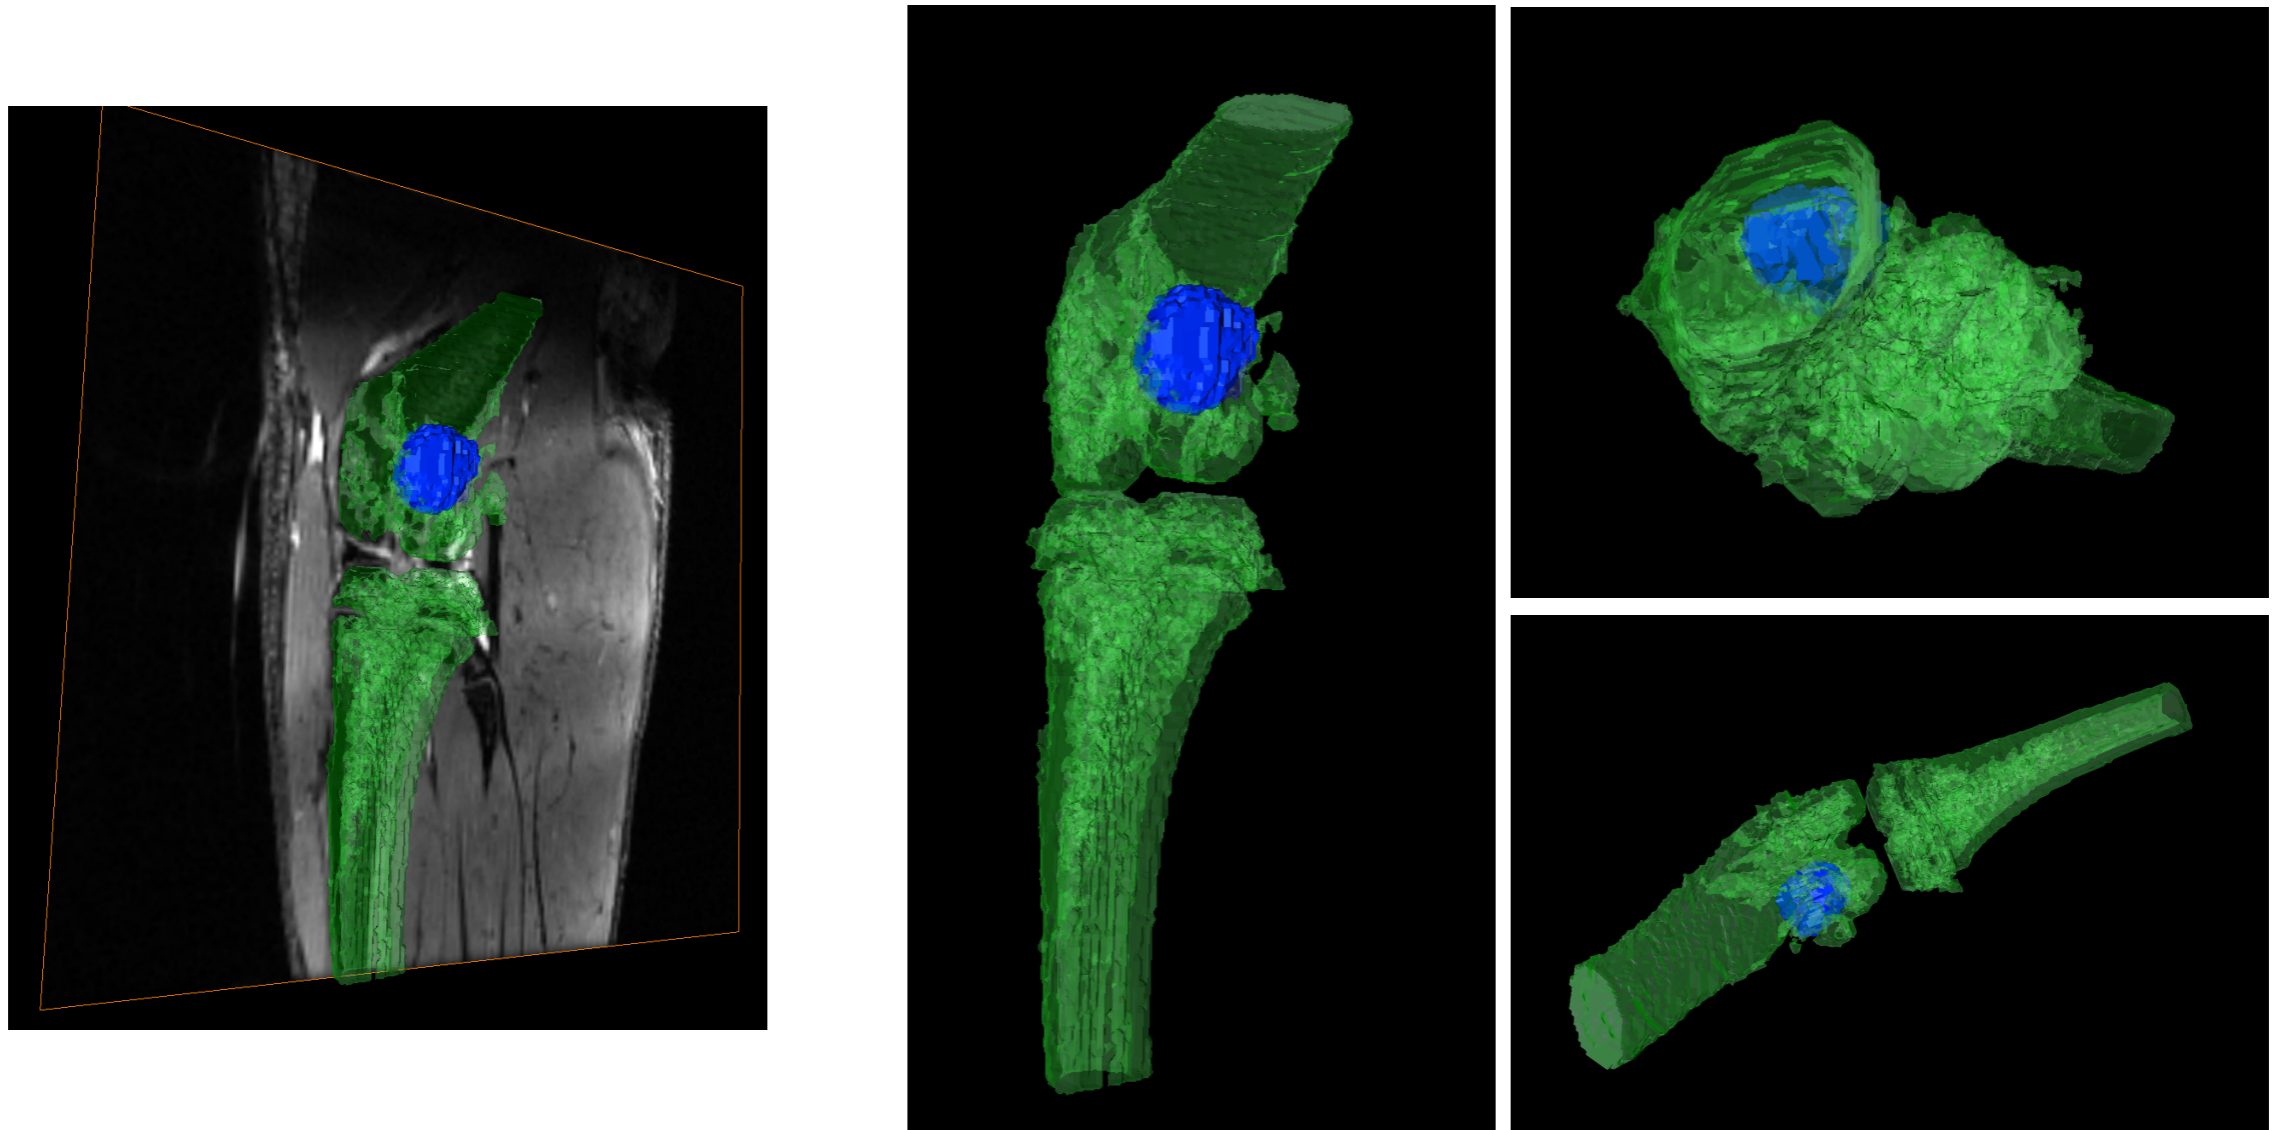

**Supplementary Figure 2:** 3D MRI representation of a rat knee with a femoral defect filled with a Matrix-HA-Fuco biomaterial, 1 week after implantation. On the left, extracted plan from a 3D MRI WS-bSSFP image and 3D superimposed representation of the femoral and tibial bones (green) and the biomaterial (blue). On the right, 3D representations shown along 3 orientations.
